# Supplementary material for: Hyperdiverse Gene Cluster in Snail Host Conveys Resistance to Human Schistosome Parasites
Source: PubMed Central journal article supplement (PMC4361660; doi:10.1371/journal.pgen.1005067), 2015-03-16

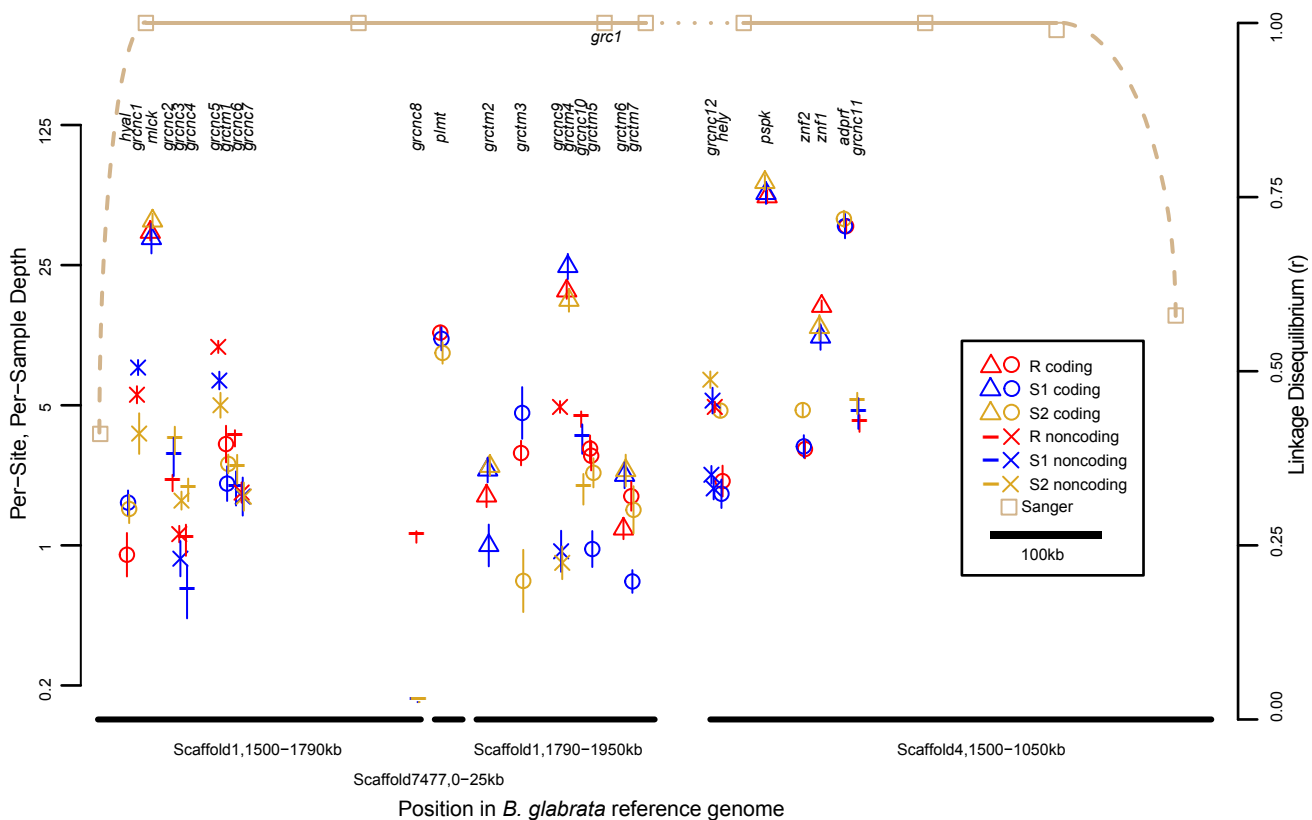

Supplement: pgen.1005067.s001.pdf [file pgen.1005067.s001.pdf]
